# Supplementary material
Source: publisher figshare collection journal article supplement (https://brill.figshare.com/ndownloader/files/34988071)
Supplement: Supplementary file 1 [file 34988071]

**Dark-colored *Oncocyclus* irises in Israel analyzed by AFLP,  
whole chloroplast genome sequencing and species distribution  
modeling**

Sergei Volis<sup>1,\*</sup>, Yonghong Zhang<sup>2,\*</sup>, Tao Deng<sup>3</sup> and Ziyoviddin Yusupov<sup>1</sup>

<sup>1</sup>*Institute of Botany, Academy of Sciences of Uzbekistan, Tashkent 100125, Uzbekistan;* <sup>2</sup>*Life Science  
Department, Yunnan Normal University, Kunming, 650204, China;* <sup>3</sup>*Key Laboratory for Plant Diversity  
and Biogeography of East Asia, Kunming Institute of Botany, Chinese Academy of Sciences, Kunming,  
650204, China*

*\*Corresponding author; e-mail: sergeivolis@yahoo.com*

*ORCID iD: Volis: 0000-0002-0544-0211*

**Supplementary material**

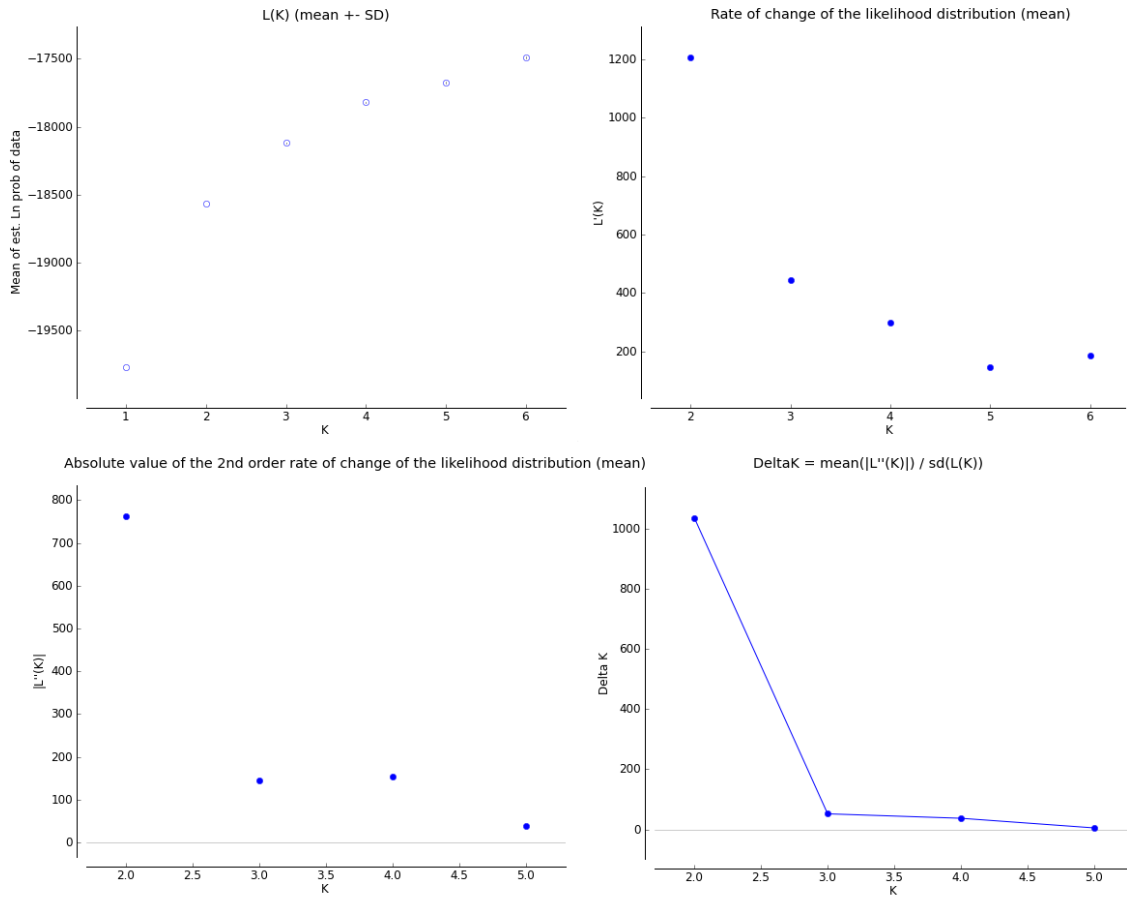

Figure S1. A plot of  $\Delta K$  against  $K$  and associated data generated using Structure Harvester (<http://taylor0.biology.ucla.edu/structureHarvester/>).
